# Supplementary material
Source: ML conference proceedings conference paper supplement (https://openaccess.thecvf.com/content/ICCV2025/html/Li_Hydra-NeXt_Robust_Closed-Loop_ICCV_2025_paper.html)
Supplement: Supplementary file 1 [file Li_Hydra-NeXt_Robust_Closed-Loop_ICCV_2025_supplemental.pdf]

# Hydra-NeXt: Robust Closed-Loop Driving with Open-Loop Training

## Supplementary Material

### 1. Details on Training Hydra-NeXt

In this section, we provide the details on training Hydra-NeXt such as loss functions and the formulation of the diffusion policy  $\pi_{dp}$ . The three policies used in Hydra-NeXt ( $\pi_{traj}$ ,  $\pi_{ctrl}$ , and  $\pi_{dp}$ ) are all trained end-to-end simultaneously on the Bench2Drive dataset [11], which is collected by the RL-based expert Think2Drive [12]. External data from different experts such as PDMLite [2] are not used.

#### 1.1. $\pi_{traj}$ : Trajectory Decoder

The loss of  $\pi_{traj}$  is consistent with Hydra-MDP [13], which consists of two terms: an imitation loss  $\mathcal{L}_{im}$  and a knowledge distillation loss  $\mathcal{L}_{kd}$ . We denote  $k$  trajectory anchors used in  $\pi_{traj}$  as  $\{T_i\}_{i=1}^k$ . The imitation loss is calculated as a cross entropy based on the expert trajectory  $\hat{T}$  and the predicted imitation scores for each trajectory anchor  $\{\mathcal{S}_i^m\}_{i=1}^k$ :

$$y_i = \frac{e^{-(\hat{T}-T_i)^2}}{\sum_{j=1}^k e^{-(\hat{T}-T_j)^2}} \quad (1)$$

$$\mathcal{L}_{im} = -\sum_{i=1}^k y_i \log(\mathcal{S}_i^m).$$

$y_i$  measures the similarity between the expert trajectory  $\hat{T}$  and each trajectory anchor  $T_i$ . The knowledge distillation loss aims to learn open-loop objectives via binary cross-entropy between predicted metric scores  $\{\mathcal{S}_i^m\}_{i=1}^k$  and the ground-truth metric scores  $\{\hat{\mathcal{S}}_i^m\}_{i=1}^k$ :

$$\mathcal{L}_{kd} = -\sum_{m,i} \hat{\mathcal{S}}_i^m \log \mathcal{S}_i^m + (1 - \hat{\mathcal{S}}_i^m) \log(1 - \mathcal{S}_i^m) \quad (2)$$

where  $m \in \{COL, SLK, EP\}$ .

$COL, SLK, EP$  correspond to the Collision, Soft Lane Keeping, and Ego Progress metrics defined in Sec. 3. The ground-truth metric scores are binary values, derived from the privileged information and each trajectory anchor. The overall loss of  $\pi_{traj}$  is formulated as:

$$\mathcal{L}_{traj} = \mathcal{L}_{im} + \mathcal{L}_{kd}. \quad (3)$$

#### 1.2. $\pi_{ctrl}$ : Control Decoder

The loss of  $\pi_{ctrl}$  computes a classification-based loss for each control signal (*i.e.* brake, throttle, and steer) across  $t_{ctrl}$  timesteps. For simplicity, a control signal tuple  $C = (brake, throttle, steer)$  is abbreviated as  $(b, th, s)$ , while the expert demonstration is denoted as  $(\hat{b}, \hat{th}, \hat{s})$ . Specifically, these loss functions are formulated as:

$$\begin{aligned} \mathcal{L}_{brake} &= \sum_{t=1}^{t_{ctrl}} Focal(b^t, \hat{b}^t) \\ \mathcal{L}_{throttle} &= \sum_{t=1}^{t_{ctrl}} CE(th^t, \hat{th}^t) \\ \mathcal{L}_{steer} &= \sum_{t=1}^{t_{ctrl}} CE(s^t, \hat{s}^t) \\ \mathcal{L}_{ctrl} &= \mathcal{L}_{brake} + \mathcal{L}_{throttle} + \mathcal{L}_{steer}, \end{aligned} \quad (4)$$

where  $Focal$  stands for the focal loss [15] and  $CE$  is the cross entropy loss. We empirically find that applying a focal loss to throttle and steer predictions leads to a performance degradation, possibly due to their more balanced distribution in the dataset.

#### 1.3. $\pi_{dp}$ : Diffusion Policy

$\pi_{dp}$  is based on the standard Diffusion Policy [3] trained on continuous data. Given expert control signals  $(\hat{C}^1, \dots, \hat{C}^{t_{dp}})$  across  $t_{dp}$  frames,  $\pi_{dp}$  is trained to predict the noise  $\varepsilon^j$  added to the expert control signals, where  $j$  is the denoising iteration. MSE loss is applied for noise prediction:

$$\mathcal{L}_{dp} = MSE(\varepsilon^j, \pi_{dp}((\hat{C}^1, \dots, \hat{C}^{t_{dp}}) + \varepsilon^j, j)). \quad (5)$$

Finally, the overall loss of Hydra-NeXt becomes

$$\mathcal{L} = \mathcal{L}_{traj} + \mathcal{L}_{ctrl} + \mathcal{L}_{dp}. \quad (6)$$

### 2. Performance of Individual Policies

We conduct experiments on how each individual policy performs on the Bench2Drive Benchmark. As shown in Tab. 2, using  $\pi_{ctrl}$  alone leads to serious performance degradation compared with the full version of Hydra-NeXt (-16.56 DS and -29.33 SR). Moreover,  $\pi_{dp}$  achieves better results when its control candidate follows the predicted trajectory from  $\pi_{traj}$  rather than being randomly selected (+5.36 DS and +4.28 SR), highlighting the importance of trajectory guidance. Finally, the full version of Hydra-NeXt achieves substantial improvements (+13.09 DS and +17.47 SR) compared with the baseline Hydra-MDP ( $\pi_{traj}$ ).

| $\pi_{traj}$ | $\pi_{ctrl}$ | $\pi_{dp}$   | Driving Score $\uparrow$ | Success Rate $\uparrow$ |
|--------------|--------------|--------------|--------------------------|-------------------------|
| ✓            |              |              | 52.80                    | 30.73                   |
|              | ✓            |              | 49.33                    | 18.87                   |
|              |              | <i>Rand.</i> | 51.18                    | 27.98                   |
|              |              | <i>Traj.</i> | 56.54                    | 32.26                   |
| ✓            | ✓            | ✓            | <b>65.89</b>             | <b>48.20</b>            |

Table 2. Performance of Individual Policies on Bench2Drive.

### 3. Efficient Diffusion Policy $\pi_{dp}$

We found that the efficiency of  $\pi_{dp}$  can be greatly enhanced without sacrificing too much performance. By replacing the DDPM with a DDIM scheduler [17], we can reduce the latency by approximately 53%, decreasing the number of denoising steps from 100 to 20. Additionally, by combining this modification with flash attention, we achieve latencies

| Method              | Perception Network | Grid Search  | NC $\uparrow$ | DAC $\uparrow$ | TTC $\uparrow$ | EP $\uparrow$ | C $\uparrow$ | PDMS $\uparrow$ |
|---------------------|--------------------|--------------|---------------|----------------|----------------|---------------|--------------|-----------------|
| Transfuser [4]      | Transfuser [4]     | -            | 97.7          | 92.8           | 92.8           | 79.2          | <b>100</b>   | 84.0            |
| DRAMA [18]          | Transfuser [4]*    | -            | 98.0          | 93.1           | 94.8           | 80.1          | <b>100</b>   | 85.5            |
| Hydra-MDP [13]      | Transfuser [4]     | $\times$     | 97.9          | 91.7           | 92.9           | 77.6          | <b>100</b>   | 83.0            |
| Hydra-MDP [13]      | Transfuser [4]     | $\checkmark$ | 98.3          | 96.0           | 94.6           | 78.7          | <b>100</b>   | 86.5            |
| DiffusionDrive [14] | Transfuser [4]     | -            | 98.2          | 96.2           | 94.7           | <b>82.2</b>   | <b>100</b>   | 88.1            |
| <b>Hydra-NeXt</b>   | Transfuser [4]     | $\times$     | <b>98.4</b>   | 95.9           | <b>94.8</b>    | 80.6          | <b>100</b>   | 87.2            |
| <b>Hydra-NeXt</b>   | Transfuser [4]     | $\checkmark$ | 98.1          | <b>97.7</b>    | 94.6           | 81.8          | <b>100</b>   | <b>88.6</b>     |

Table 1. **Performance of E2E-AD Methods on NAVSIM.** All methods above use Transfuser [4] with ResNet34 [9] as the perception backbone. \*DRAMA [18] uses Mamba [5] for multi-modal interaction. Hydra-MDP [13] uses grid search to obtain the optimal hyper-parameters for weighting different predicted metric scores.

| Method                       | Latency (ms) $\downarrow$ | D.S. $\uparrow$ | S.R. $\uparrow$ |
|------------------------------|---------------------------|-----------------|-----------------|
| VAD                          | 224.3                     | 39.42           | 10.00           |
| Hydra-NeXt (w/o $\pi_{dp}$ ) | 250.6                     | 60.40           | 48.10           |
| Hydra-NeXt* (DDPM)           | 528.3                     | 65.89           | 48.20           |
| Hydra-NeXt* (DDIM)           | 243.9                     | 64.87           | 46.63           |

Table 3. **Efficiency of Different Diffusion Schedulers.** \* denotes Flash-attention [6].

comparable to VAD while maintaining strong closed-loop performance, with only a marginal 1% drop in the Driving Score. Therefore, we conclude that  $\pi_{dp}$  can be both effective and efficient with the right design choices.

#### 4. Implementation on NAVSIM

Our implementation of Hydra-NeXt on NAVSIM uses a different perception network Transfuser [4] following Hydra-MDP [13]. Transfuser [4] features two backbones for camera and lidar feature extraction, a BEV segmentation head, a 3D object detection head, and transformer layers for multi-modal feature interaction. This setting helps to make a fair comparison to baselines such as Hydra-MDP and DiffusionDrive [14]. For  $\pi_{ctrl}$  and  $\pi_{dp}$ , we incorporate the same transformer architectures used on Bench2Drive for acceleration and steering rate predictions since NAVSIM [7] does not utilize control signals like CARLA [1, 8] and only evaluates the trajectory. Therefore, these auxiliary predictions only act as extra learning targets. As a result, Hydra-NeXt surpasses the state-of-the-art planner DiffusionDrive by 0.5 PDMS (see Tab. 1) when adopting the grid search trick [13] among different metric scores in  $\pi_{traj}$ .

#### 5. Implementation on CARLA-Garage

We provide additional results on the CARLA-Garage dataset [10] collected by the PDM-Lite expert [2]. Compared to the Bench2Drive dataset [11], this dataset features smooth driving with no jittery behavior. We experiment with

| Method                | Expert      | D.S. $\uparrow$ | S.R. $\uparrow$ |
|-----------------------|-------------|-----------------|-----------------|
| Hydra-NeXt            | Think2Drive | 73.86           | 50.00           |
| TF++ $\dagger$ [10]   | PDM-Lite    | 84.21           | 67.27           |
| SimLingo [16]         | PDM-Lite    | 85.94           | 66.82           |
| Hydra-NeXt* $\dagger$ | PDM-Lite    | 86.00           | 68.18           |

Table 4. **Performance of Models Trained with Different Experts.**  $\dagger$ Ensemble of three models trained with different seeds.

$\pi_{traj}$  and  $\pi_{dp}$  within the TF++ framework [10]. Specifically, we replace the longitudinal control head of TF++ with  $\pi_{traj}$  (imitation + collision head) and fuse the outputs of  $\pi_{dp}$  with longitudinal and lateral controls. We then ensemble three models trained with different seeds. This variant, Hydra-NeXt\*, achieves a Driving Score of 86%, surpassing existing methods.

#### 6. Visualization Results

Fig. 1 shows more visualization results in interactive scenarios (Merging, Overtaking, and Give Way). The Diffusion Policy  $\pi_{dp}$  can capture multiple planning modes such as following other agents or overtaking them (see the second row and the fourth row of the figure).

#### 7. Limitations.

Although Hydra-NeXt shows outstanding closed-loop driving performance compared with E2E methods, it still falls behind RL-based experts using privileged input. The runtime efficiency of the Diffusion Policy also deserves optimization. We expect these to be addressed in future research.

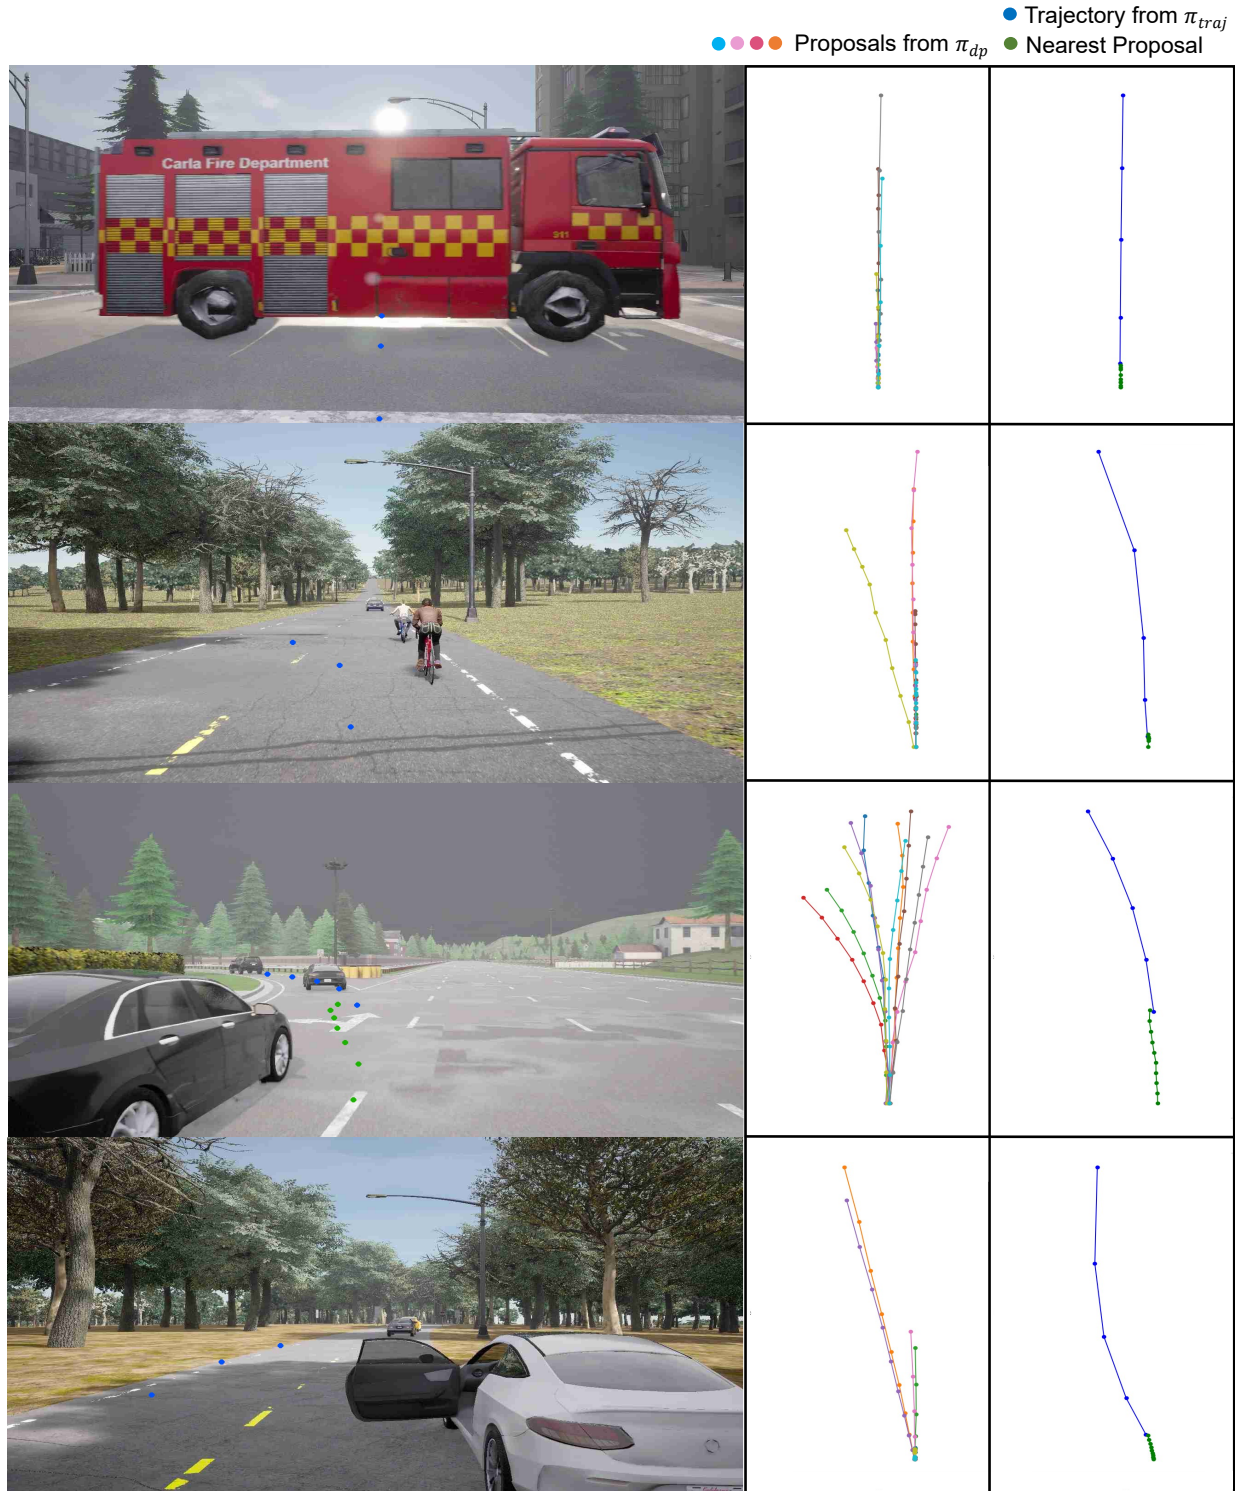

Figure 1. **More Visualizations of Trajectory Refinement.** The figure shows the front-view image, trajectories transformed from control proposals, and the selected nearest proposal to the predicted trajectory.

## References

- [1] Carla: Carla autonomous driving leaderboard (2022). <https://leaderboard.carla.org/>, 2022. 2
- [2] Jens Beißwenger. PDM-Lite: A rule-based planner for carla leaderboard 2.0. <https://github.com/>

[OpenDriveLab/DriveLM/blob/DriveLM-CARLA/docs/report.pdf](#), 2024. 1, 2

- [3] Cheng Chi, Zhenjia Xu, Siyuan Feng, Eric Cousineau, Yilun Du, Benjamin Burchfiel, Russ Tedrake, and Shuran Song. Diffusion policy: Visuomotor policy learning via action diffusion. *The International Journal of Robotics Research*, page 02783649241273668, 2023. 1
- [4] Kashyap Chitta, Aditya Prakash, Bernhard Jaeger, Zehao Yu, Katrin Renz, and Andreas Geiger. Transfuser: Imitation with transformer-based sensor fusion for autonomous driving. *IEEE TPAMI*, 2022. 2
- [5] Tri Dao and Albert Gu. Transformers are ssms: Generalized models and efficient algorithms through structured state space duality. *arXiv preprint arXiv:2405.21060*, 2024. 2
- [6] Tri Dao, Daniel Y. Fu, Stefano Ermon, Atri Rudra, and Christopher Ré. FlashAttention: Fast and memory-efficient exact attention with IO-awareness. In *Advances in Neural Information Processing Systems (NeurIPS)*, 2022. 2
- [7] Daniel Dauner, Marcel Hallgarten, Tianyu Li, Xinshuo Weng, Zhiyu Huang, Zetong Yang, Hongyang Li, Igor Gilitschenski, Boris Ivanovic, Marco Pavone, Andreas Geiger, and Kashyap Chitta. Navsim: Data-driven non-reactive autonomous vehicle simulation and benchmarking. In *NeurIPS*, 2024. 2
- [8] Alexey Dosovitskiy, German Ros, Felipe Codevilla, Antonio Lopez, and Vladlen Koltun. Carla: An open urban driving simulator. In *CoRL*, pages 1–16. PMLR, 2017. 2
- [9] Kaiming He, Xiangyu Zhang, Shaoqing Ren, and Jian Sun. Deep residual learning for image recognition. In *CVPR*, pages 770–778, 2016. 2
- [10] Bernhard Jaeger, Kashyap Chitta, and Andreas Geiger. Hidden biases of end-to-end driving models. In *Proc. of the IEEE International Conf. on Computer Vision (ICCV)*, 2023. 2
- [11] Xiaosong Jia, Zhenjie Yang, Qifeng Li, Zhiyuan Zhang, and Junchi Yan. Bench2drive: Towards multi-ability benchmarking of closed-loop end-to-end autonomous driving. In *NeurIPS*, 2024. 1, 2
- [12] Qifeng Li, Xiaosong Jia, Shaobo Wang, and Junchi Yan. Think2drive: Efficient reinforcement learning by thinking in latent world model for quasi-realistic autonomous driving (in carla-v2). In *ECCV*, 2024. 1
- [13] Zhenxin Li, Kailin Li, Shihao Wang, Shiyi Lan, Zhiding Yu, Yishen Ji, Zhiqi Li, Ziyue Zhu, Jan Kautz, Zuxuan Wu, et al. Hydra-mdp: End-to-end multimodal planning with multi-target hydra-distillation. *arXiv preprint arXiv:2406.06978*, 2024. 1, 2
- [14] Bencheng Liao, Shaoyu Chen, Haoran Yin, Bo Jiang, Cheng Wang, Sixu Yan, Xinbang Zhang, Xiangyu Li, Ying Zhang, Qian Zhang, et al. Diffusiondrive: Truncated diffusion model for end-to-end autonomous driving. *arXiv preprint arXiv:2411.15139*, 2024. 2
- [15] T Lin. Focal loss for dense object detection. *arXiv preprint arXiv:1708.02002*, 2017. 1
- [16] Katrin Renz, Long Chen, Elahe Arani, and Oleg Sinavski. Simlingo: Vision-only closed-loop autonomous driving with language-action alignment. In *Proceedings of the Computer Vision and Pattern Recognition Conference*, pages 11993–12003, 2025. 2
- [17] Jiaming Song, Chenlin Meng, and Stefano Ermon. Denoising diffusion implicit models. *arXiv:2010.02502*, 2020. 1
- [18] Chengran Yuan, Zhanqi Zhang, Jiawei Sun, Shuo Sun, Zefan Huang, Christina Dao Wen Lee, Dongen Li, Yuhang Han, Anthony Wong, Keng Peng Tee, et al. Drama: An efficient end-to-end motion planner for autonomous driving with mamba. *arXiv preprint arXiv:2408.03601*, 2024. 2
